# Supplementary material
Source: publisher site journal article supplement (https://www.dovepress.com/article/379349)
Supplement: Supplementary file 1 [file get_supplementary_file.php]

**Supplemental Results**

**Figure legends**

**Figure S1 IMQ induced psoriasis-like dermatitis in mice.** Mice were topically treated daily on right ear and back skin with 5% IMQ cream for 5 days. A, Ear thickness was measured daily. B, Representative macroscopic appearance of IMQ-induced mice. C, H&E staining of the back skin in mice, scale bar, 50 µm. Data are shown as the mean ± SEM. *P < 0.05, **P < 0.01, ***P <0.001, and ****P <0.0001.

**Figure S2** Marker genes in each cell cluster were show in violin plots.

**Figure S3** A, Marker genes in each macrophage cluster were show in heatmap. B, Violin plots of marker genes in each macrophage cluster.

**Figure S4** Differential gene expression profile of different cell types in control vs psoriatic mice skin.

**Figure S5** A, Marker genes in each NK/T cell cluster were show in heatmap. B, Violin plots of marker genes in each NK/T cell cluster. C, The T cell receptor (TCR) distribution of NK/T cells across different groups. The proportions of clonal NK/T cells in two different groups (left panel). Unique (n = 1), duplicated (n = 2), and clonal (n ≥ 3) TCRs are labeled with different colors (right panel).

**Figure S6** A, Marker genes in each conventional dendritic cell (cDC) cluster were show in heatmap. B, Violin plots of marker genes in each cDC cluster.

**Figure S7** A, Marker genes in each plasmacytoid dendritic cell (pDC) cluster were show in heatmap. B, Violin plots of marker genes in each pDC cluster.

**Figure S1**

**
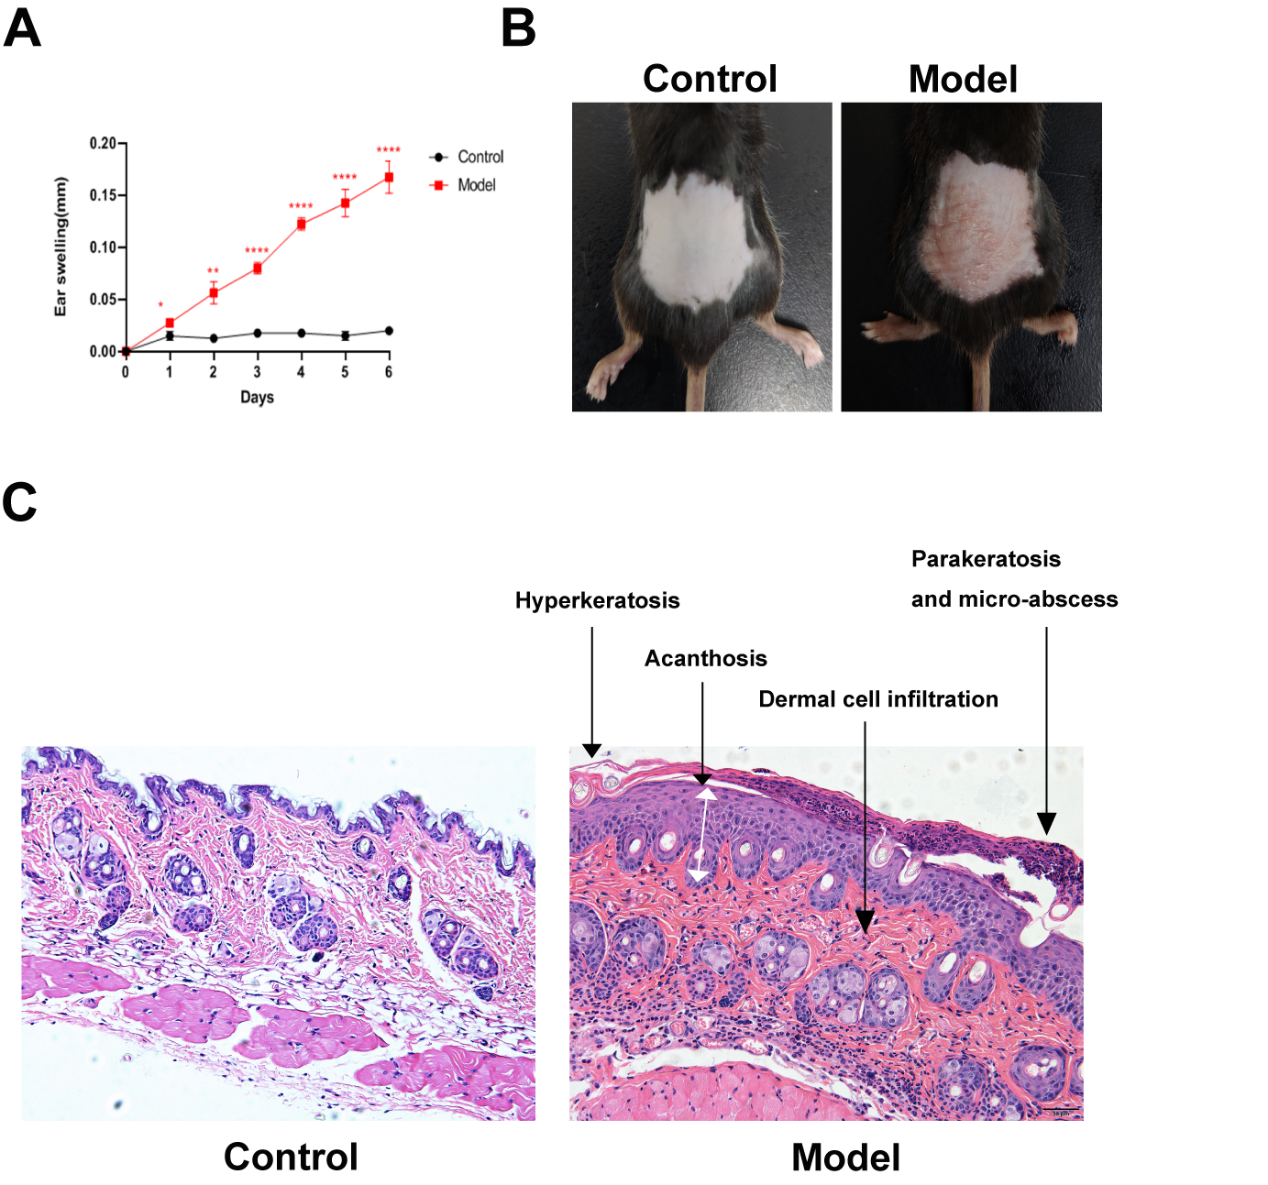
**

**Figure S2**


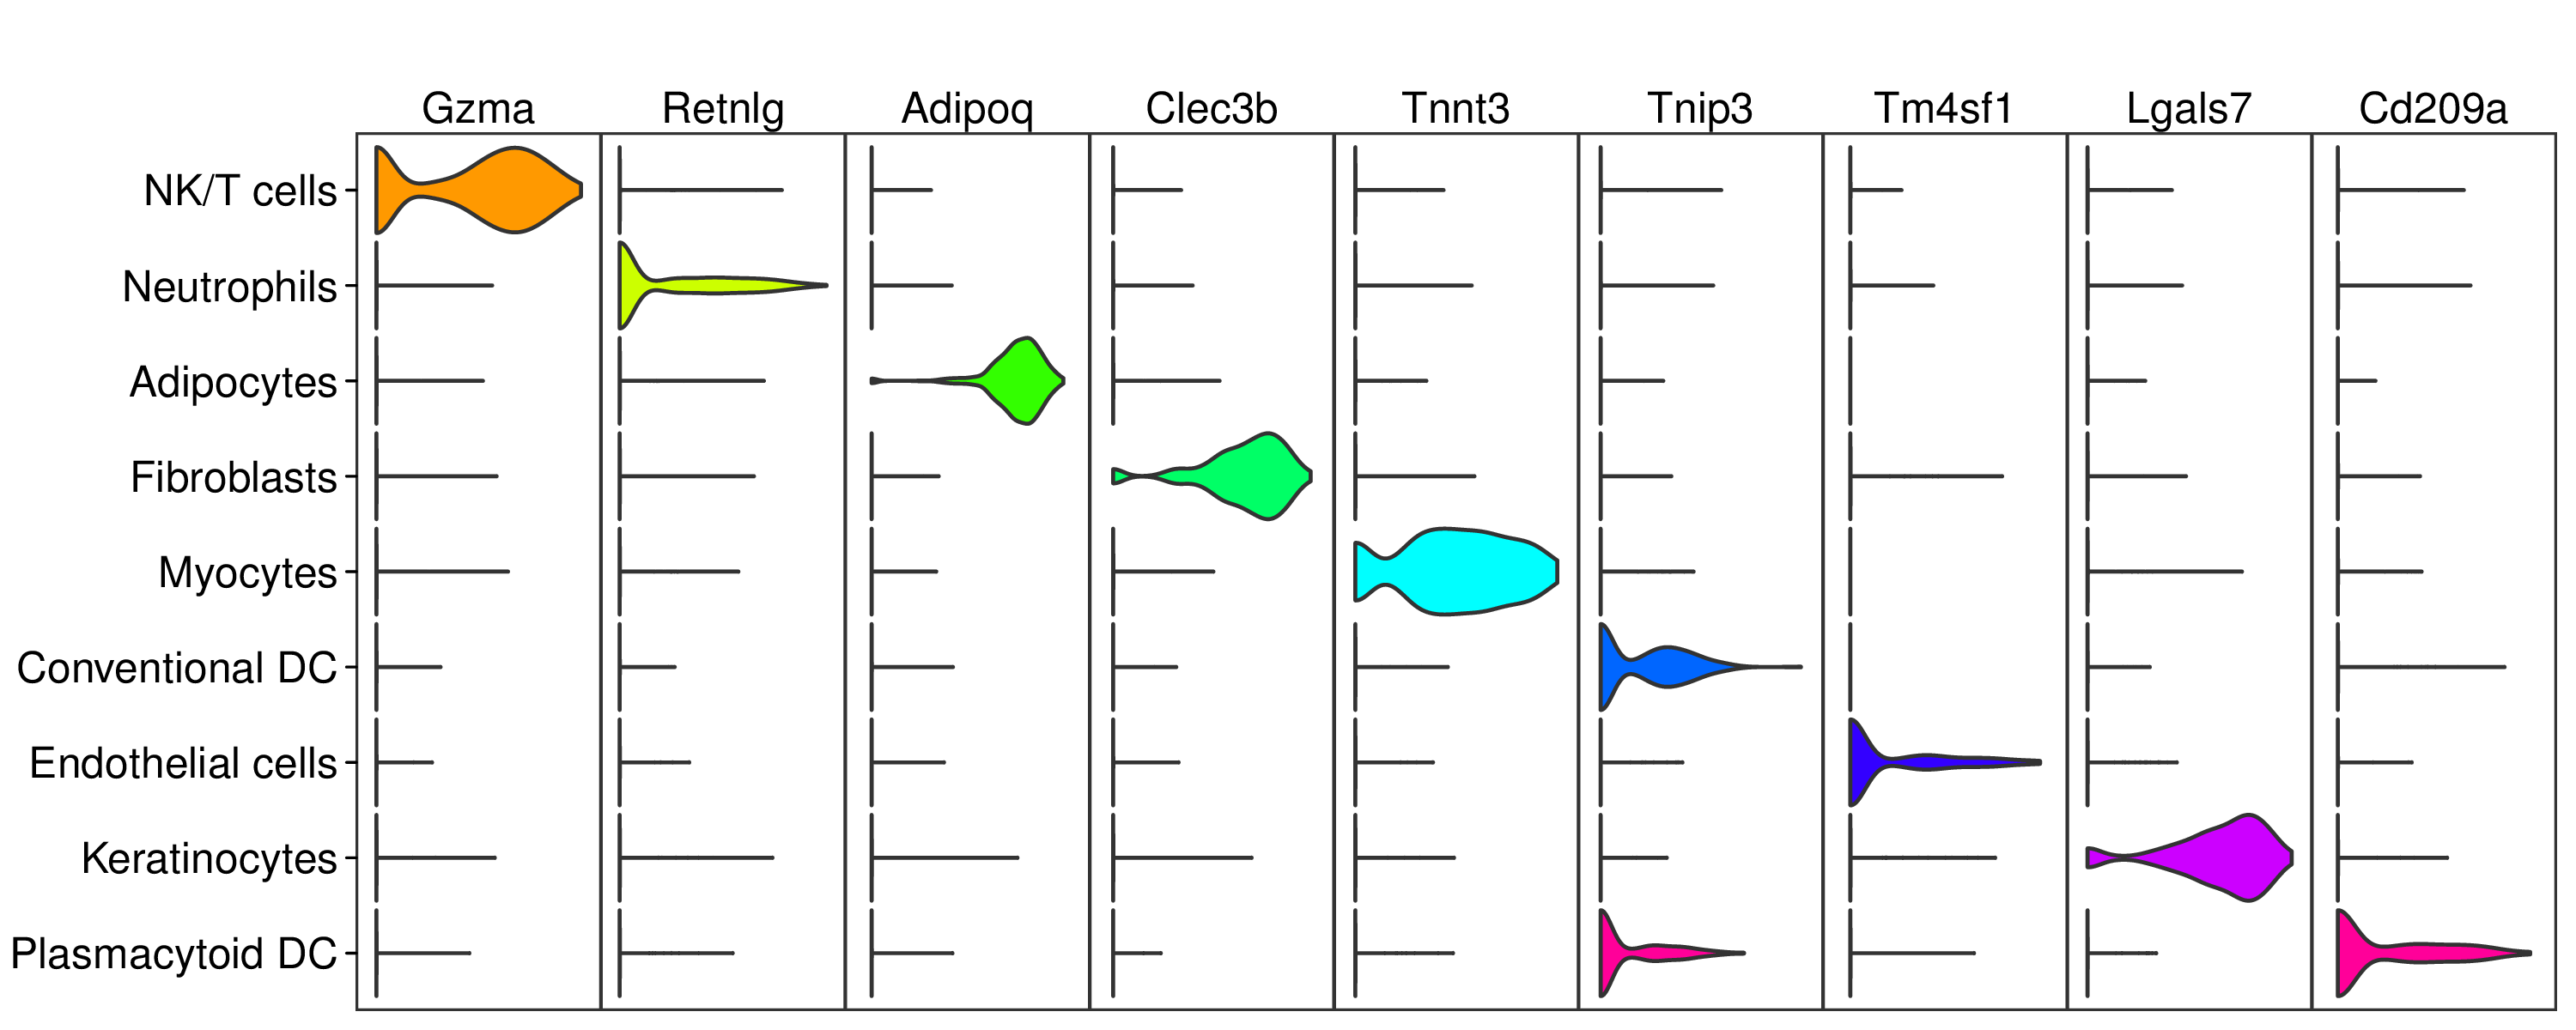


**Figure S3**


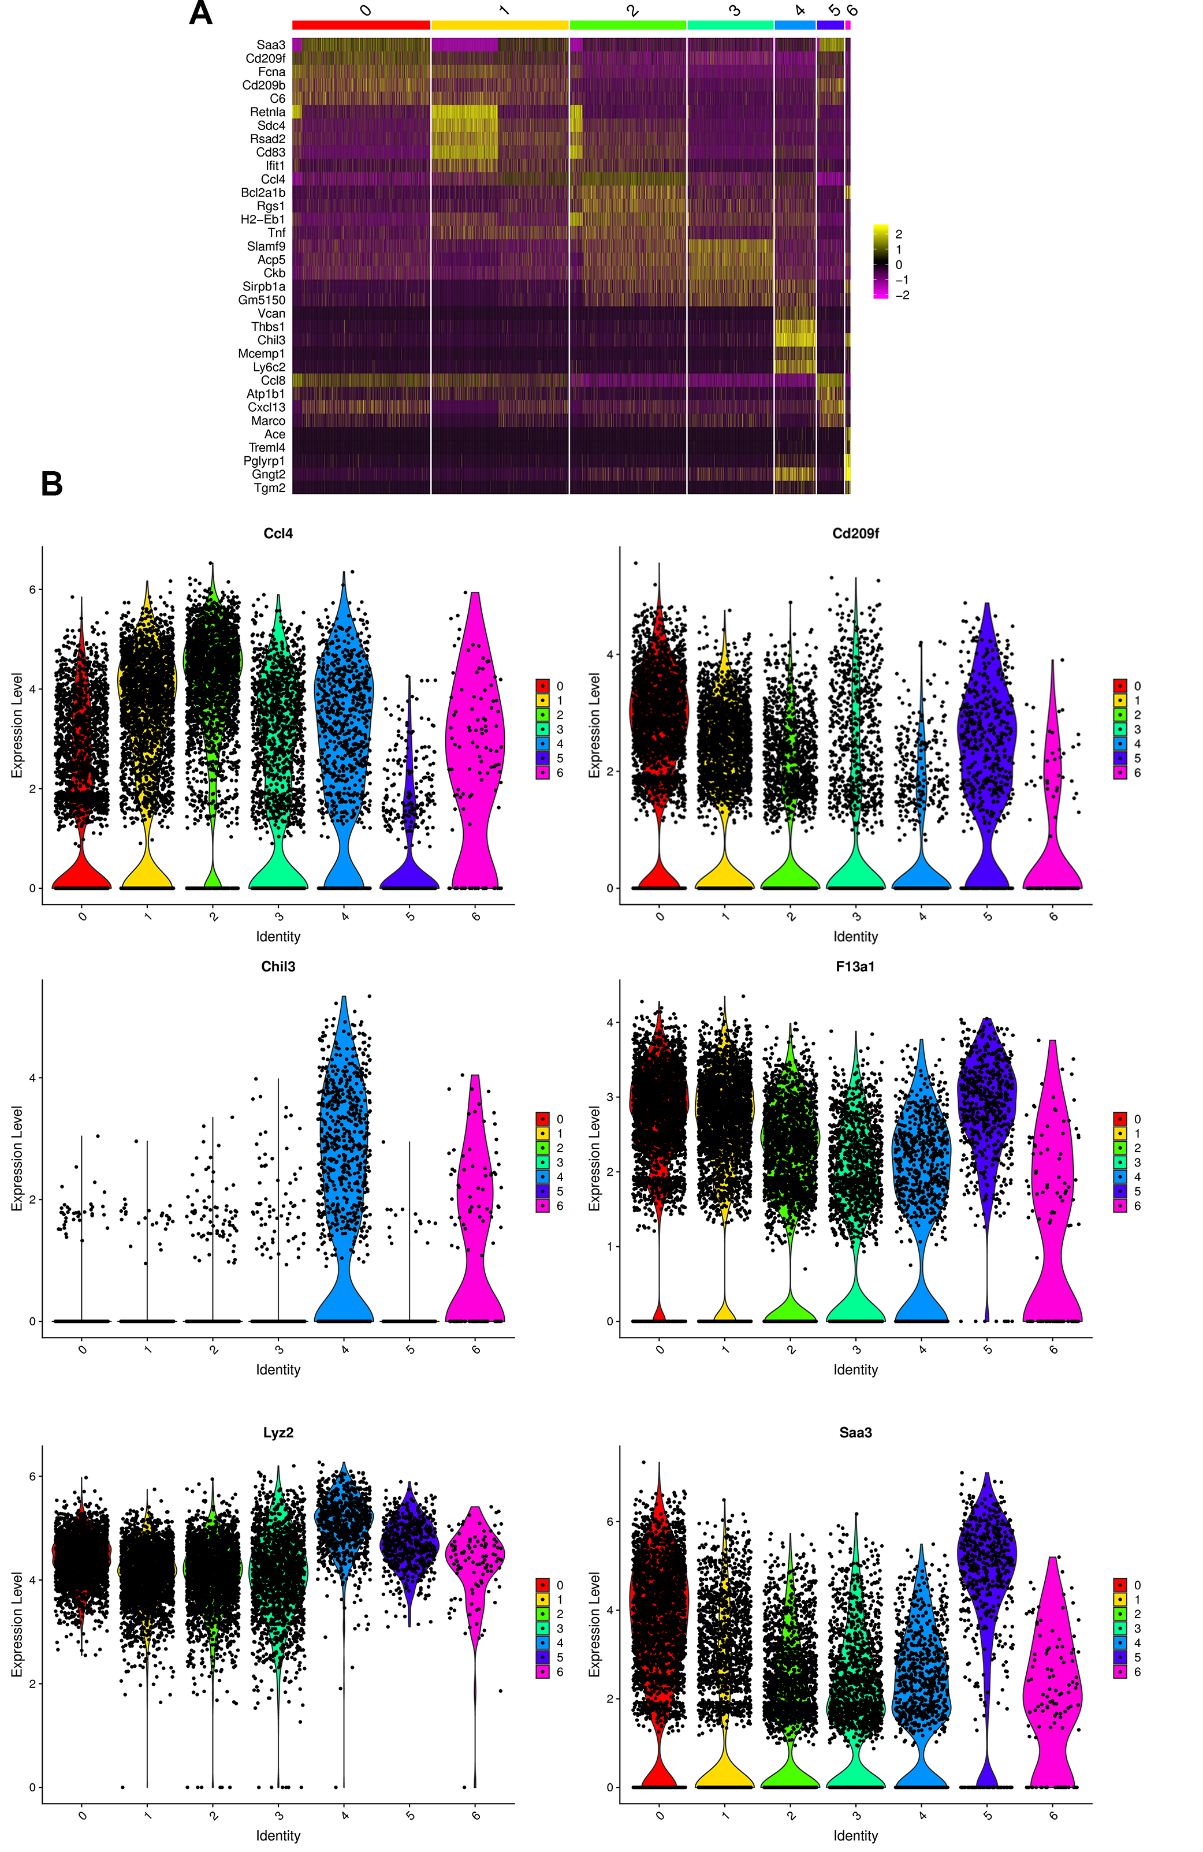


**Figure S4**


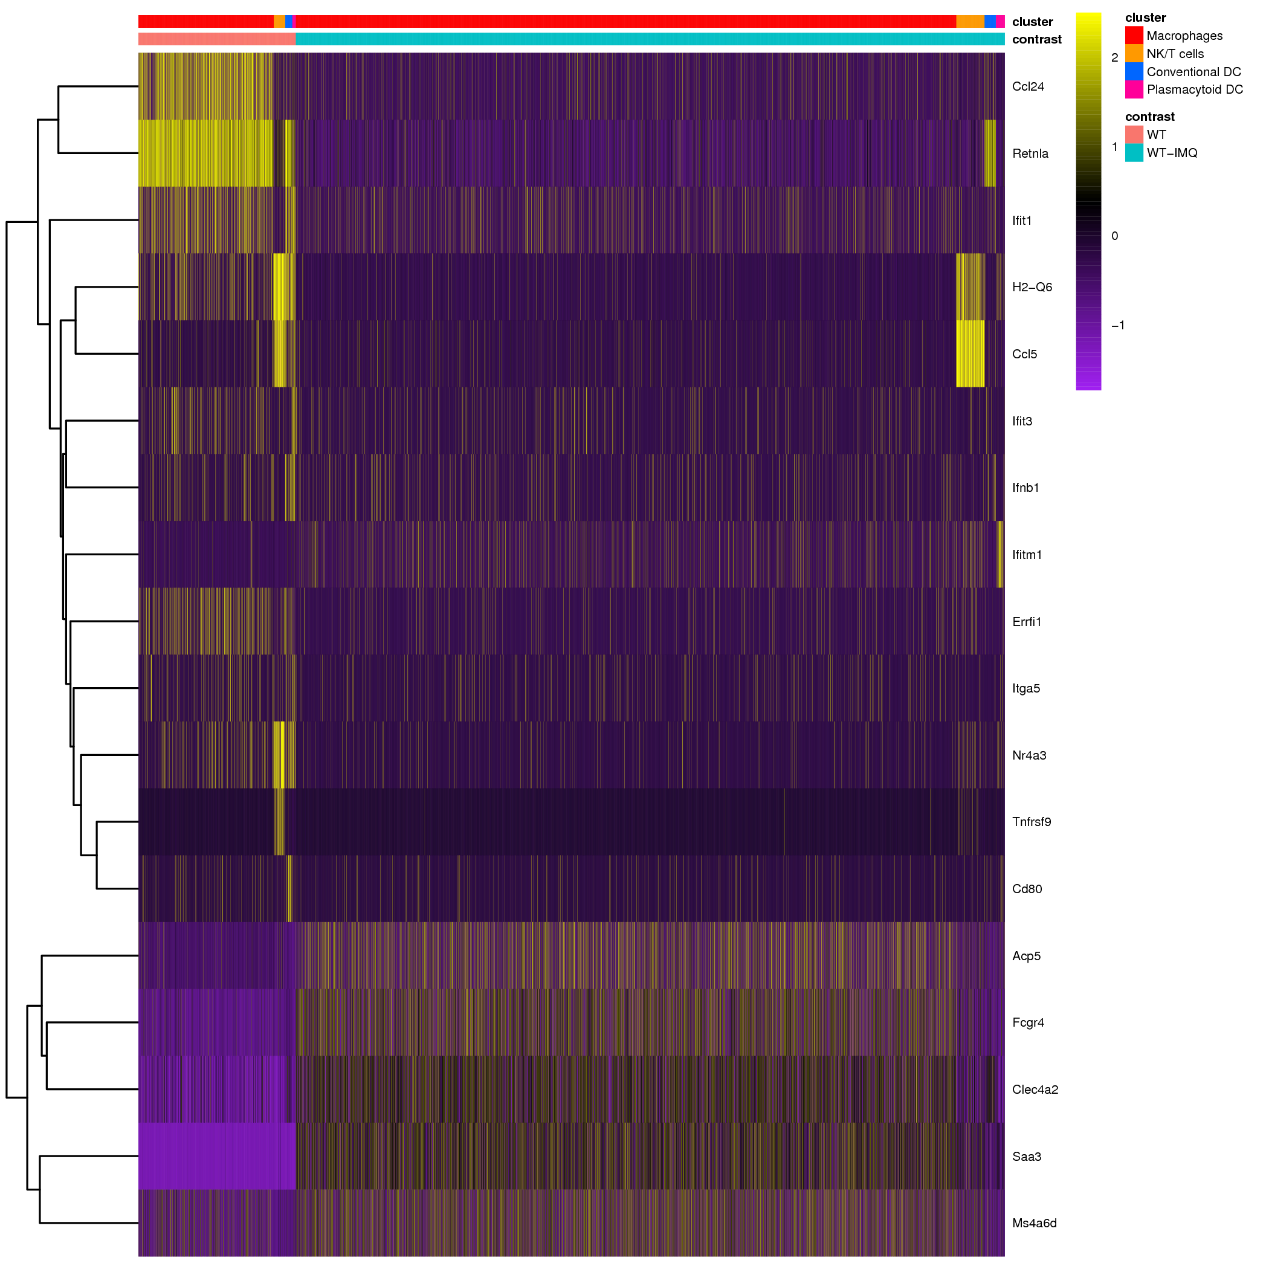


**Figure S5**


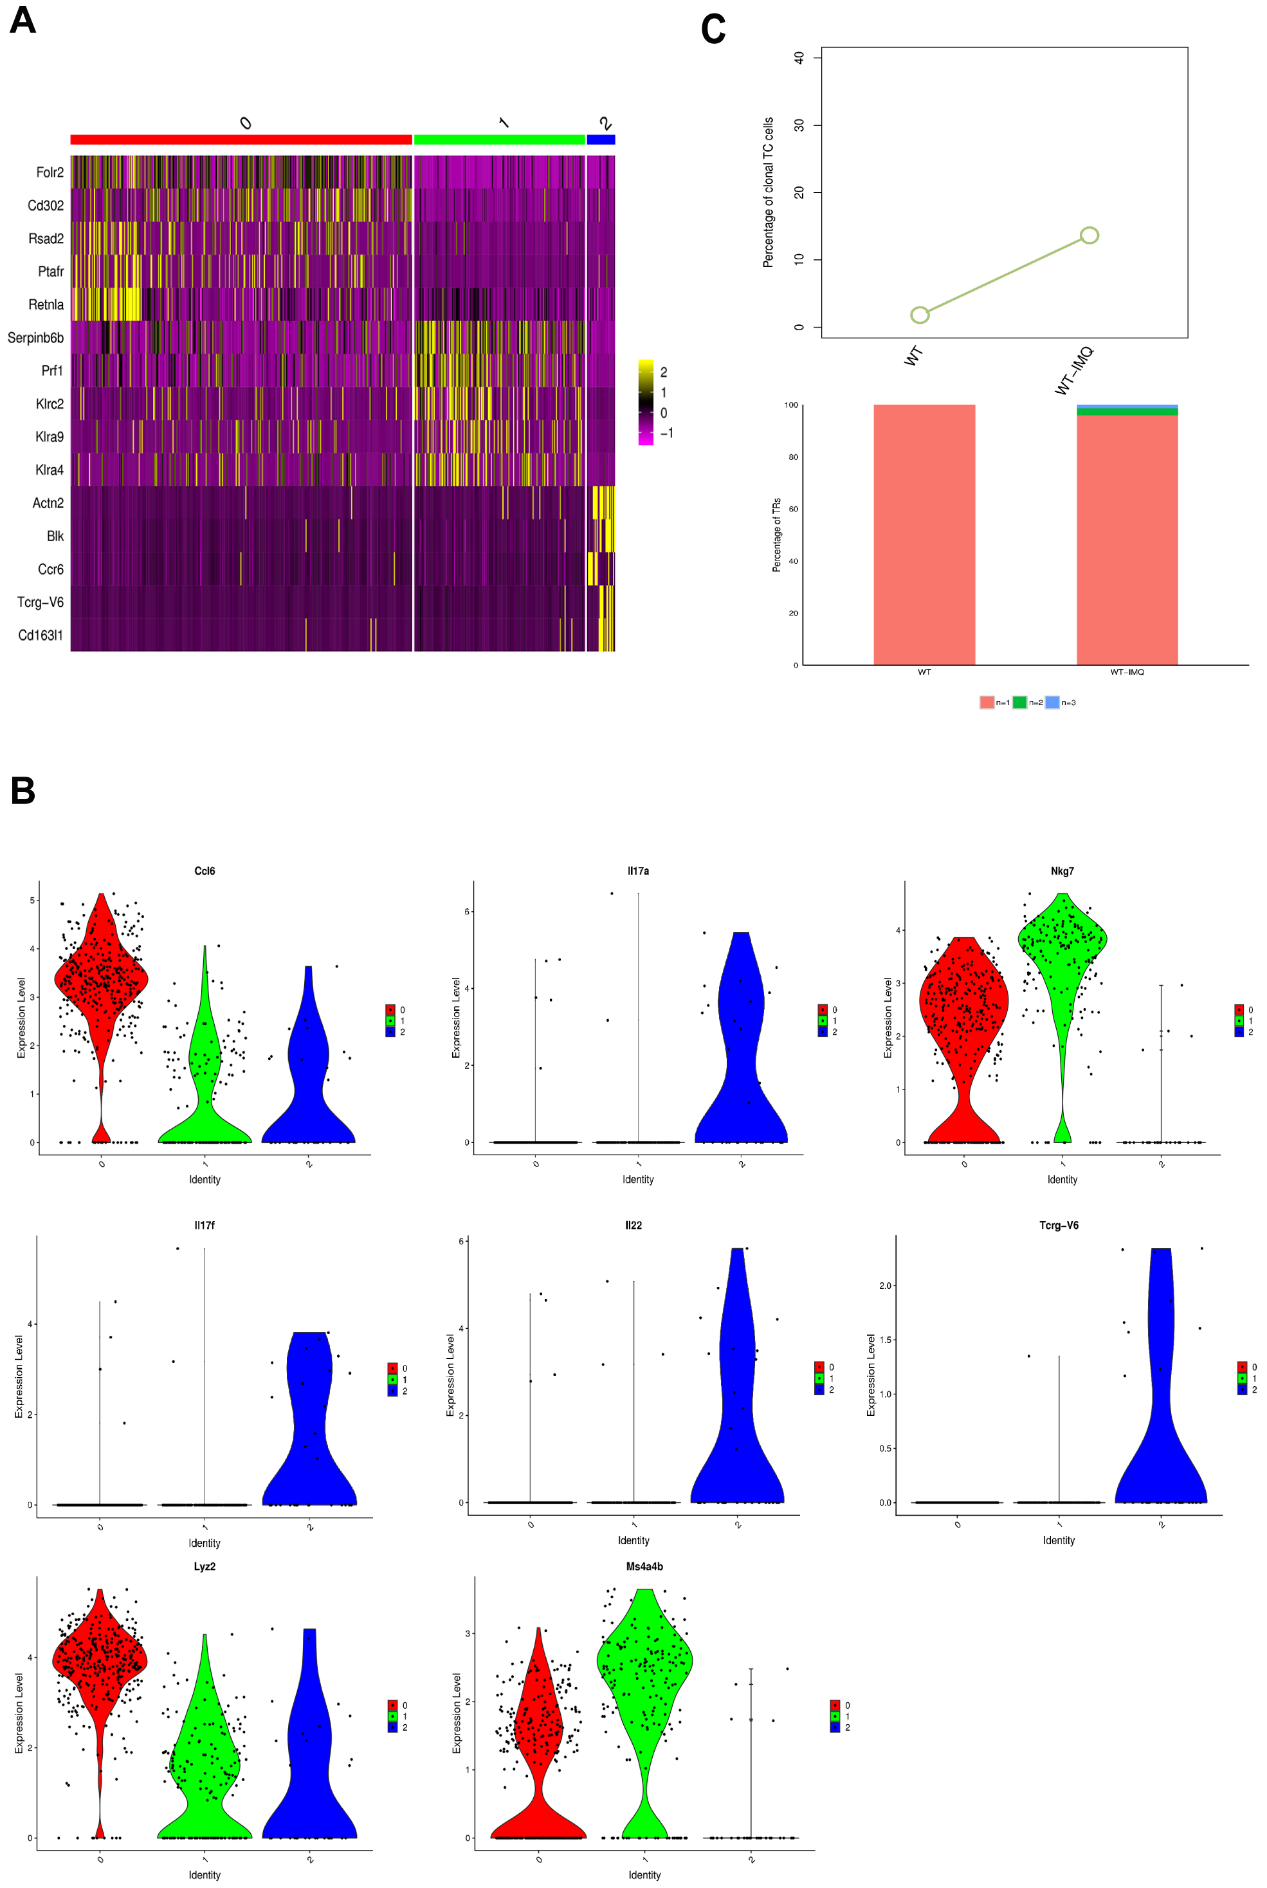


**Figure S6**

**
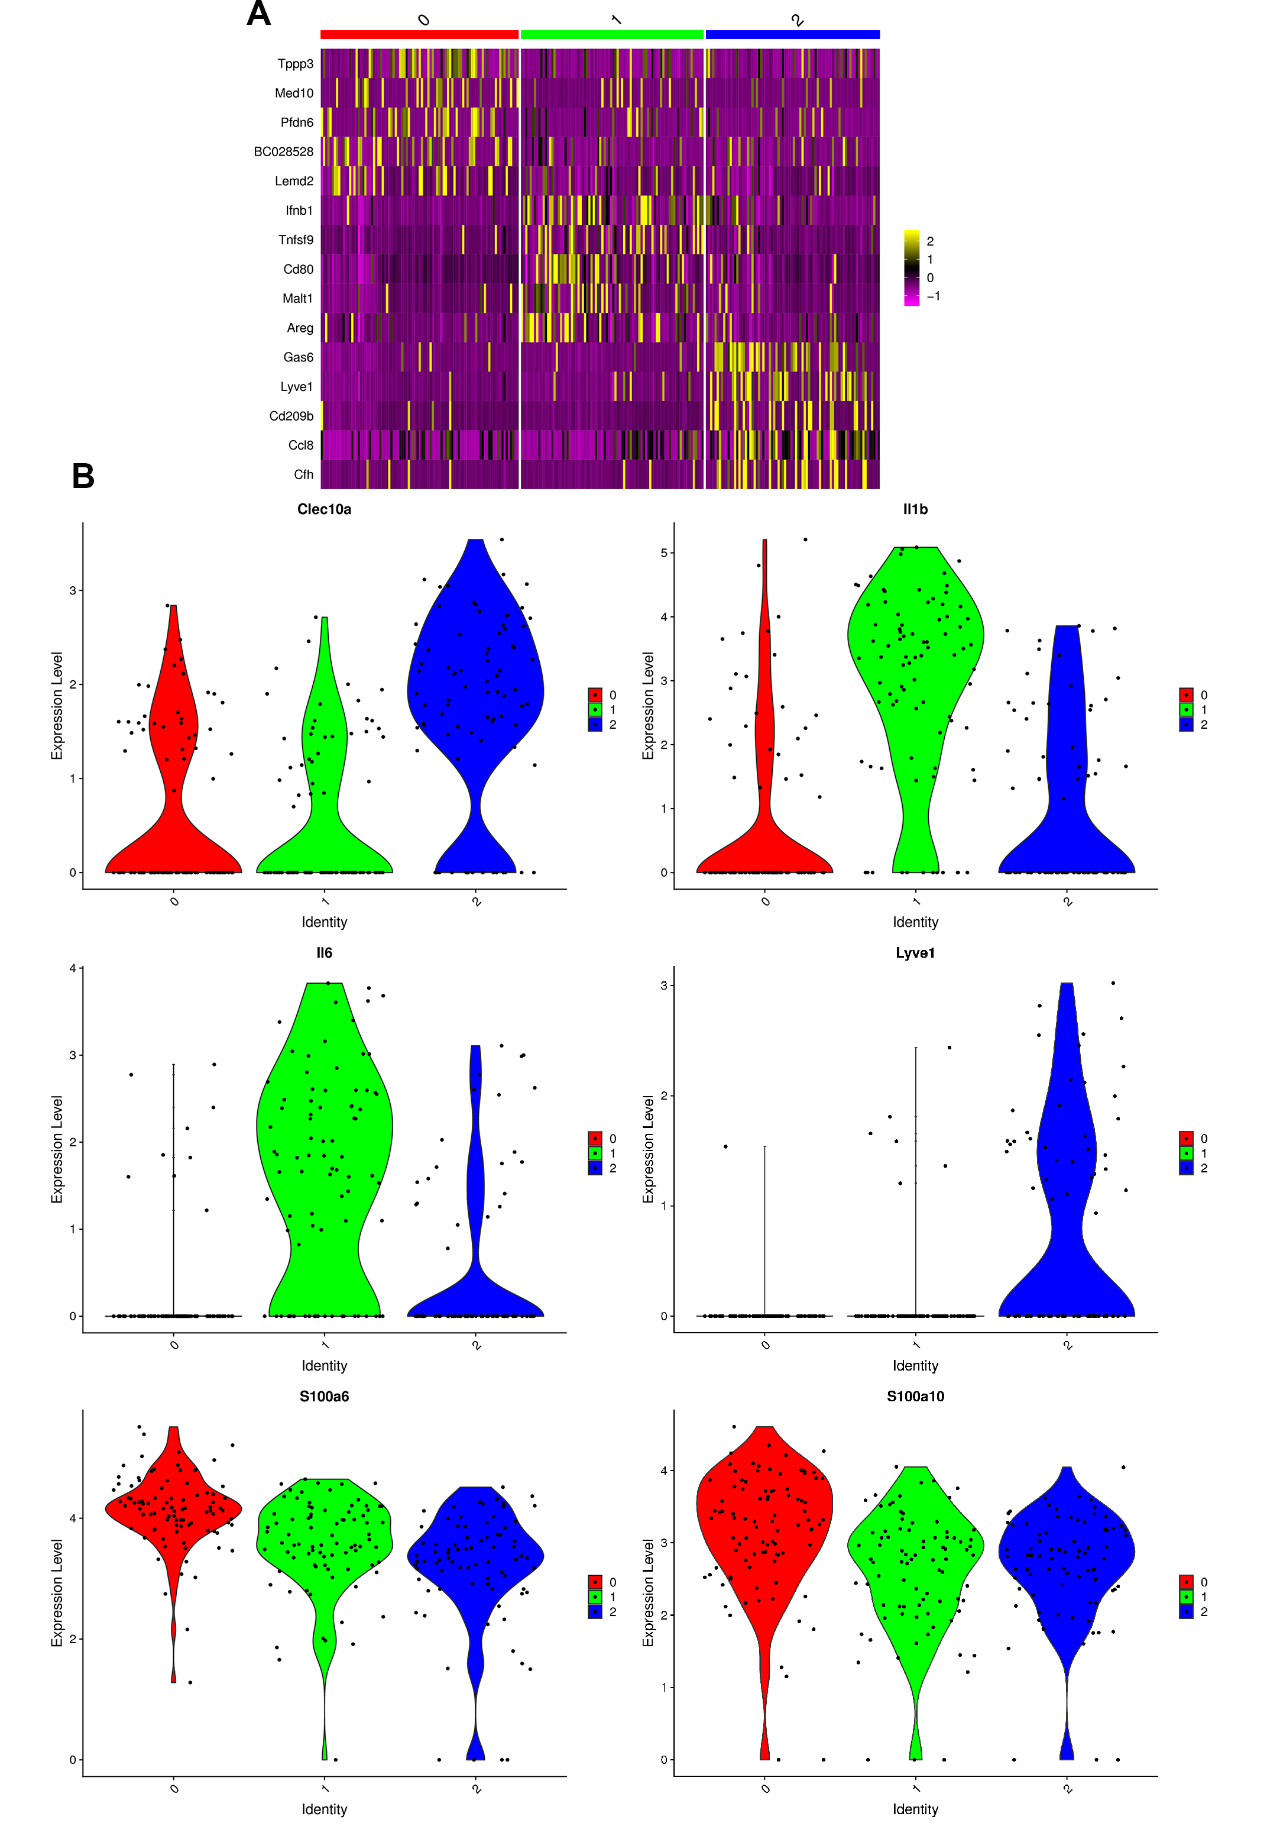
**

**Figure S7**

**
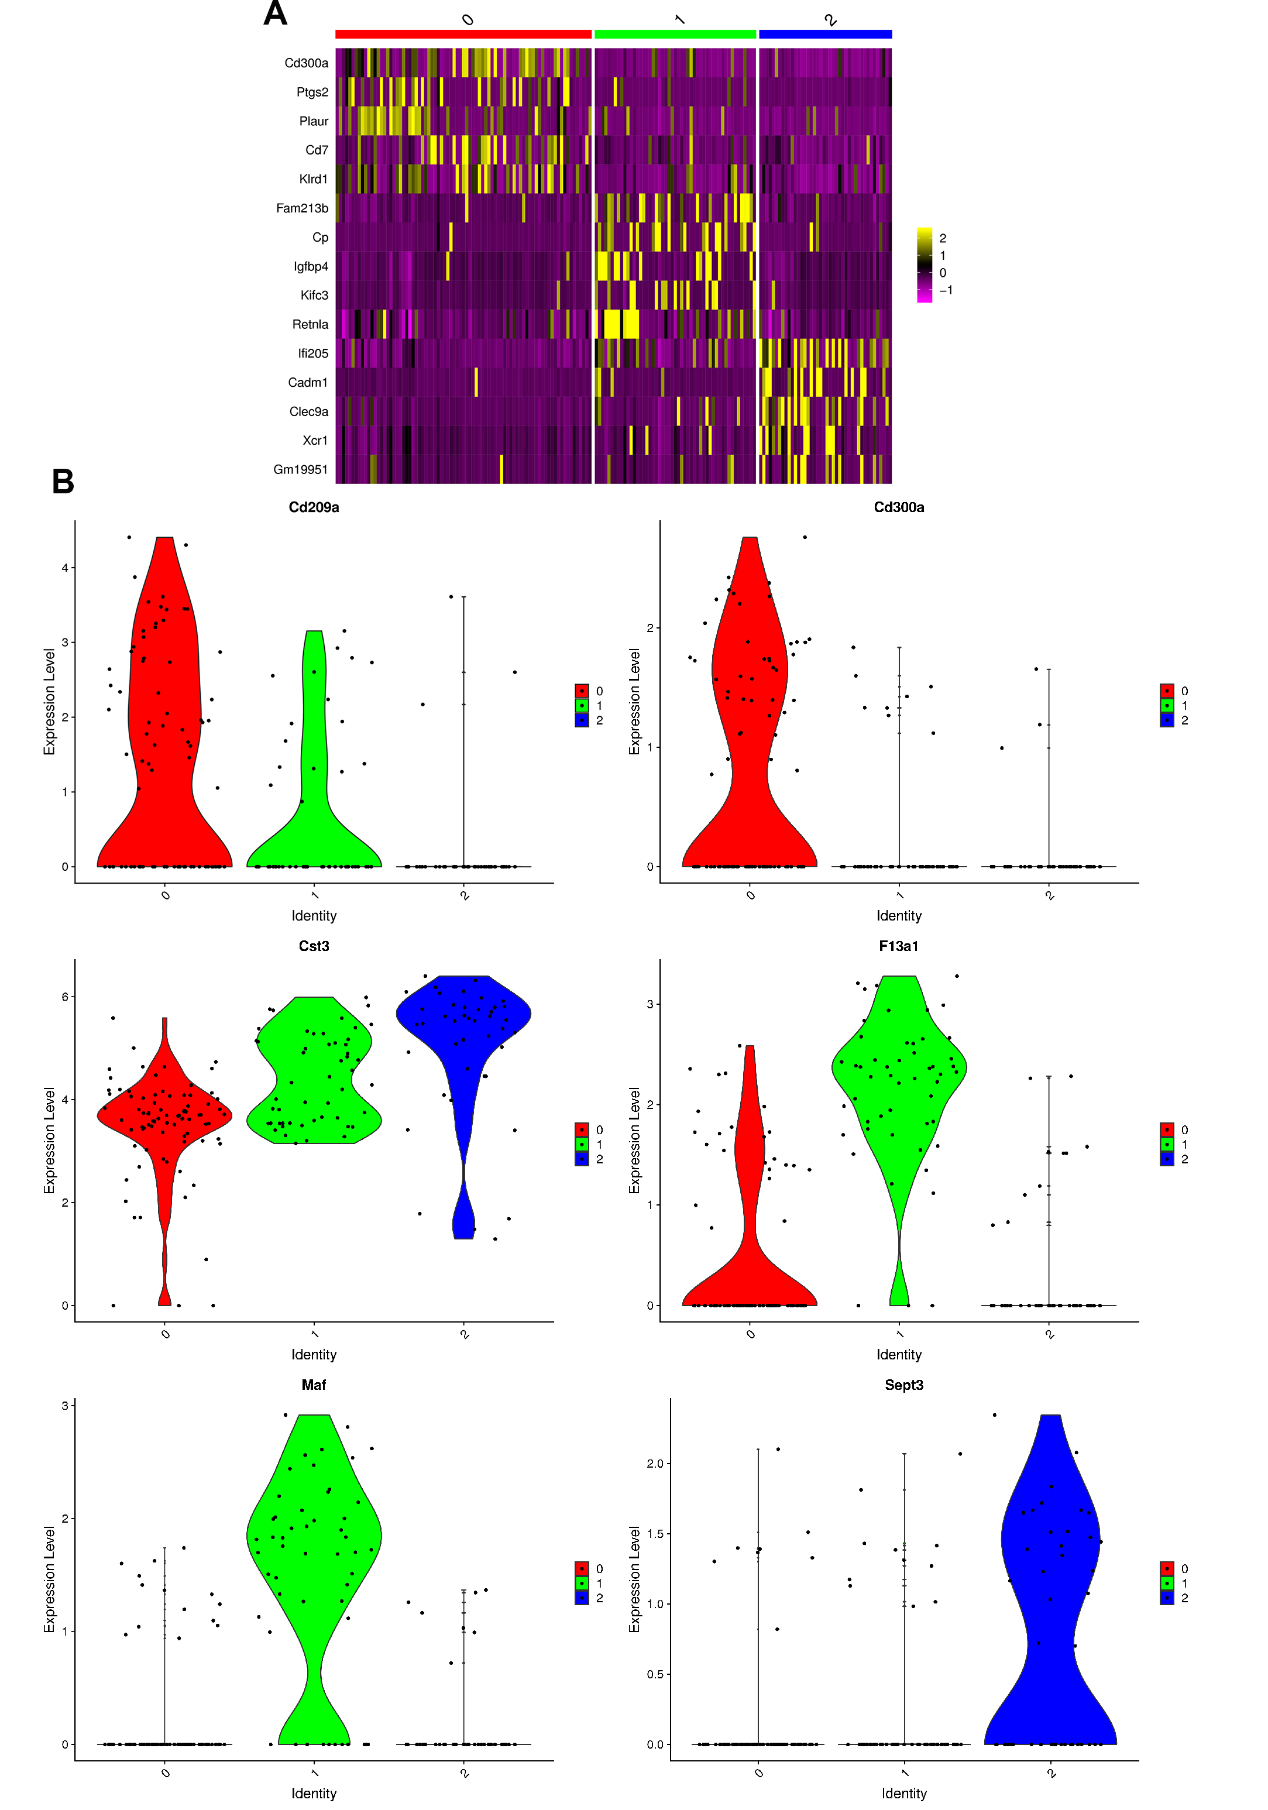
**
